# The Journal of Neuropsychiatry

## and Clinical Neurosciences

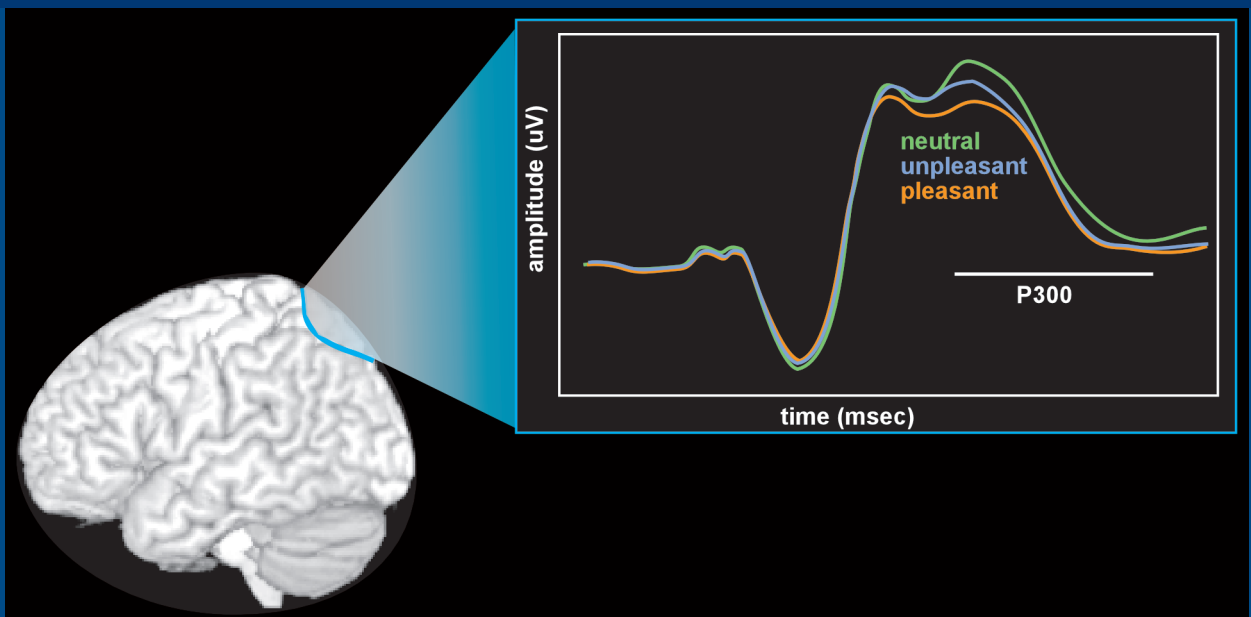

White Matter Dementia: Origin, Development, Progress, and Prospects

Screening for Cognitive Impairments After Traumatic Brain Injury:  
A Comparison of a Brief Computerized Battery With the  
Montreal Cognitive Assessment

Factors Associated With New-Onset Depression After Stroke

Conflict-Related Anterior Cingulate Functional Connectivity  
Is Associated With Past Suicidal Ideation and Behavior  
in Recent-Onset Psychotic Major Mood Disorders

Amygdala Volumetric Change Following Psychotherapy  
for Posttraumatic Stress Disorder
