Statement of Ownership, Management, and Circulation  
(All Periodicals Publications Except Requester Publications)

|                                                                                                                                                                                                                                                                                                                                                                                                                                                                                                                                                                         |                                                                                 |                                                               |                              |
|-------------------------------------------------------------------------------------------------------------------------------------------------------------------------------------------------------------------------------------------------------------------------------------------------------------------------------------------------------------------------------------------------------------------------------------------------------------------------------------------------------------------------------------------------------------------------|---------------------------------------------------------------------------------|---------------------------------------------------------------|------------------------------|
| 1. Publication Title<br>AMERICAN PSYCHIATRIC ASSOCIATION/<br>JOURNAL OF NEUROPSYCHIATRY AND<br>CLINICAL NEUROSCIENCES (THE)                                                                                                                                                                                                                                                                                                                                                                                                                                             | 2. Publication Number<br>4241                                                   | ISSN<br>8950172                                               | 3. Filing Date<br>09/26/2016 |
| 4. Issue Frequency<br>QUARTERLY                                                                                                                                                                                                                                                                                                                                                                                                                                                                                                                                         | 5. Number of Issues Published Annually<br>4                                     | 6. Annual Subscription Price<br>\$ 260.00                     |                              |
| 7. Complete Mailing Address of Known Office of Publication<br>1000 WILSON BLVD STE 1825<br>ARLINGTON, ARLINGTON, VA 22209-3924                                                                                                                                                                                                                                                                                                                                                                                                                                          |                                                                                 | Contact Person<br>ROGER DOMRAS<br>Telephone<br>(703) 907-8544 |                              |
| 8. Complete Mailing Address of Headquarters or General Business Office of Publisher<br>1000 Wilson Blvd., Ste. 1825<br>Arlington, VA 22209-3924                                                                                                                                                                                                                                                                                                                                                                                                                         |                                                                                 |                                                               |                              |
| 9. Full Names and Complete Mailing Addresses of Publisher, Editor, and Managing Editor                                                                                                                                                                                                                                                                                                                                                                                                                                                                                  |                                                                                 |                                                               |                              |
| Publisher (Name and complete mailing address)<br>Rebecca Rinehart<br>1000 WILSON BLVD STE 1825<br>ARLINGTON, VA 22209-3924                                                                                                                                                                                                                                                                                                                                                                                                                                              |                                                                                 |                                                               |                              |
| Editor (Name and complete mailing address)<br>David B. Archibeg, M.D.<br>1000 WILSON BLVD STE 1825<br>ARLINGTON, VA 22209-3924                                                                                                                                                                                                                                                                                                                                                                                                                                          |                                                                                 |                                                               |                              |
| Managing Editor (Name and complete mailing address)<br>Michael Roy<br>1000 WILSON BLVD STE 1825<br>ARLINGTON, VA 22209-3924                                                                                                                                                                                                                                                                                                                                                                                                                                             |                                                                                 |                                                               |                              |
| 10. Owner (Do not leave blank. If the publication is owned by a corporation, give the name and address of the corporation immediately followed by the names and addresses of all stockholders owning or holding 1 percent or more of the total amount of stock. If not owned by a corporation, give names and addresses of the individual owners. If owned by a partnership or other unincorporated firm, give its name and address as well as those of each individual owner. If the publication is published by a nonprofit organization, give its name and address.) |                                                                                 |                                                               |                              |
| Full Name<br>American Psychiatric Assoc.                                                                                                                                                                                                                                                                                                                                                                                                                                                                                                                                | Complete Mailing Address<br>1000 WILSON BLVD STE 1825, ARLINGTON, VA 22209-3924 |                                                               |                              |
| 11. Known Bondholders, Mortgagees, and Other Security Holders Owning or Holding 1 Percent or More of Total Amount of Bonds, Mortgages, or Other Securities. If none, check box <input checked="" type="checkbox"/> None                                                                                                                                                                                                                                                                                                                                                 |                                                                                 |                                                               |                              |
| Full Name                                                                                                                                                                                                                                                                                                                                                                                                                                                                                                                                                               | Complete Mailing Address                                                        |                                                               |                              |
| 12. Tax Status (For completion by nonprofit organizations authorized to mail at nonprofit rates)<br>The purpose, function, and nonprofit status of this organization and the exempt status for federal income tax purposes:<br><input checked="" type="checkbox"/> Has Not Changed During Preceding 12 Months.<br><input type="checkbox"/> Has Changed During Preceding 12 Months (Publisher must submit explanation of change with this statement)                                                                                                                     |                                                                                 |                                                               |                              |

|                                                                                                                                                                                                                                                                                                                                                        |                                                             |                                                                |
|--------------------------------------------------------------------------------------------------------------------------------------------------------------------------------------------------------------------------------------------------------------------------------------------------------------------------------------------------------|-------------------------------------------------------------|----------------------------------------------------------------|
| 13. Publication Title<br>AMERICAN PSYCHIATRIC ASSOCIATION/JOURNAL OF<br>NEUROPSYCHIATRY AND CLINICAL NEUROSCIENCES (THE)                                                                                                                                                                                                                               | 14. Issue Date for Circulation Data Below<br>07/15/2016     |                                                                |
| 15. Extend and Nature of Circulation                                                                                                                                                                                                                                                                                                                   | Average No. Copies Each Issue<br>During Preceding 12 Months | No. Copies of Single Issue<br>Published Nearest to Filing Date |
| a. Total Numbers of Copies (Net press run)                                                                                                                                                                                                                                                                                                             | 675                                                         | 639                                                            |
| b. Paid Circulation (By Mail and Outside the Mail)                                                                                                                                                                                                                                                                                                     |                                                             |                                                                |
| (1) Mailed Outside County Paid Subscriptions Stated on PS Form 3541 (include paid distribution above nominal rate, advertiser's proof copies, and exchange copies)                                                                                                                                                                                     | 263                                                         | 327                                                            |
| (2) Mailed In-County Paid Subscriptions Stated on PS Form 3541 (include paid distribution above nominal rate, advertiser's proof copies, and exchange copies)                                                                                                                                                                                          | 0                                                           | 0                                                              |
| (3) Paid Distribution Outside the Mails Including Sales Through Dealers and Carriers, Street Vendors, Counter Sales, and Other Paid Distribution Outside USPS                                                                                                                                                                                          | 52                                                          | 61                                                             |
| (4) Paid Distribution by Other Classes of Mail Through the USPS (e.g. First-Class Mail)                                                                                                                                                                                                                                                                | 0                                                           | 0                                                              |
| c. Total Paid Distribution (Sum of 15b (1), (2), (3), (4))                                                                                                                                                                                                                                                                                             | 315                                                         | 388                                                            |
| d. Free or Nominal Rate Distribution (By Mail and Outside the Mail)                                                                                                                                                                                                                                                                                    |                                                             |                                                                |
| (1) Free or Nominal Rate Outside County Copies included on PS Form 3541                                                                                                                                                                                                                                                                                | 70                                                          | 79                                                             |
| (2) Free or Nominal Rate In-County Copies included on PS Form 3541                                                                                                                                                                                                                                                                                     | 0                                                           | 0                                                              |
| (3) Free or Nominal Rate Copies Mailed at Other Classes Through the USPS (e.g. First-Class Mail)                                                                                                                                                                                                                                                       | 0                                                           | 0                                                              |
| (4) Free or Nominal Rate Distribution Outside the Mail (Carriers or other means)                                                                                                                                                                                                                                                                       | 47                                                          | 47                                                             |
| e. Total Free or Nominal Rate Distribution (Sum of 15d (1), (2), (3), (4))                                                                                                                                                                                                                                                                             | 117                                                         | 126                                                            |
| f. Total Distribution (Sum of 15c and 15e)                                                                                                                                                                                                                                                                                                             | 432                                                         | 514                                                            |
| g. Copies not Distributed                                                                                                                                                                                                                                                                                                                              | 0                                                           | 0                                                              |
| h. Total (Sum of 15f and 15g)                                                                                                                                                                                                                                                                                                                          | 432                                                         | 514                                                            |
| i. Percent Paid ((15c / 15f) times 100)                                                                                                                                                                                                                                                                                                                | 72.92 %                                                     | 75.49 %                                                        |
| 16. If total circulation includes electronic copies, report that circulation on lines below.                                                                                                                                                                                                                                                           |                                                             |                                                                |
| a. Paid Electronic Copies                                                                                                                                                                                                                                                                                                                              | 0                                                           | 0                                                              |
| b. Total Paid Print Copies (Line 15c) + Paid Electronic Copies                                                                                                                                                                                                                                                                                         | 0                                                           | 0                                                              |
| c. Total Print Distribution (Line 15f) + Paid Electronic Copies                                                                                                                                                                                                                                                                                        | 0                                                           | 0                                                              |
| d. Percent Paid (Both Print and Electronic Copies)                                                                                                                                                                                                                                                                                                     | 0.00 %                                                      | 0.00 %                                                         |
| <input type="checkbox"/> I certify that 50% of all my distributed copies (Electronic and Print) are paid above a nominal price.                                                                                                                                                                                                                        |                                                             |                                                                |
| 17. Publication of Statement of Ownership<br><input checked="" type="checkbox"/> If the publication is a general publication, publication of this statement is required. Will be printed in the 10/15/2016 issue of this publication. <input type="checkbox"/> Publication not required.                                                               |                                                             |                                                                |
| 18. Signature and Title of Editor, Publisher, Business Manager, or Owner                                                                                                                                                                                                                                                                               | Title                                                       | Date                                                           |
| Peter Van Woerden                                                                                                                                                                                                                                                                                                                                      | Dir. Finance Publishing Operations                          | 09/26/2016 00:00:00 AM                                         |
| I certify that all information furnished on this form is true and complete. I understand that anyone who furnishes false or misleading information on this form or who omits material or information requested on the form may be subject to criminal sanctions (including fines and imprisonment) and/or civil sanctions (including civil penalties). |                                                             |                                                                |

# Understanding Mental Disorders

## Your Guide to DSM-5®

American Psychiatric Association

A consumer guide for anyone who has been touched by mental illness!

With Foreword by Patrick J. Kennedy

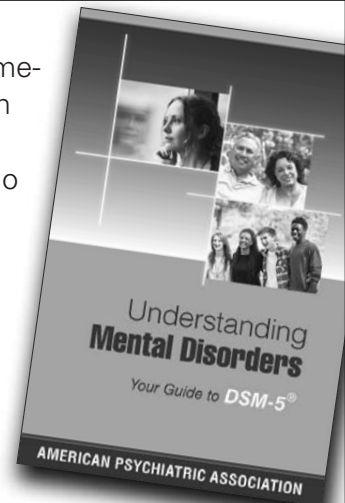

Most of us know someone who suffers from a mental illness. This book helps those who may be struggling with mental health problems, as well as those who want to help others achieve mental health and well-being.

Based on the latest, fifth edition of the *Diagnostic and Statistical Manual of Mental Disorders*—known as DSM-5®—**Understanding Mental Disorders** provides valuable insight on what to expect from an illness and its treatment—and will help readers recognize symptoms, know when to seek help, and get the right care. Featured disorders include depression, schizophrenia, ADHD, autism spectrum disorder, posttraumatic stress disorder, and bipolar disorder, among others.

2015 • 388 pages • ISBN 978-1-58562-491-1  
Paperback • \$24.95 • Item #62491

AMERICAN  
PSYCHIATRIC  
ASSOCIATION  
PUBLISHING

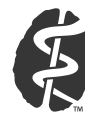

www.appi.org  
Phone: 703-907-7322  
Toll Free: 1-800-368-5777  
Email: appi@psych.org

20% Discount • American Psychiatric Association Members  
25% Discount • APA Resident-Fellow Members

# psychiatryonline.org

Your Destination for Lifelong Learning in Psychiatry

Your one-stop resource for information on diagnosis, treatment, guidelines, the latest research, and breaking news from the field.

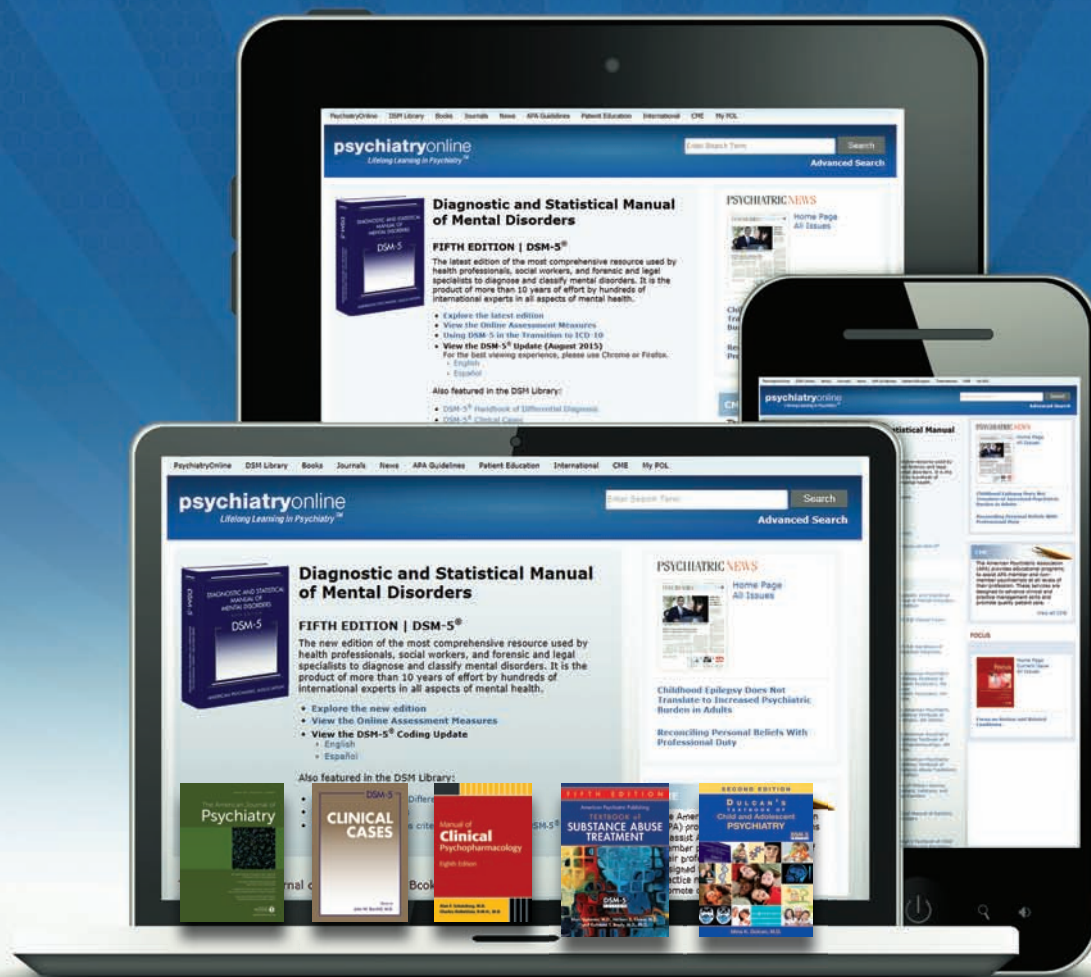

Subscribe to products individually or to the DSM Select package that includes the DSM-5® library, books and select journals.

Go to [www.appi.org](http://www.appi.org) to subscribe.

Institutional subscription options are available.

For more information contact: [institutions@psych.org](mailto:institutions@psych.org); 800-368-5777 ext. 7874

AMERICAN  
PSYCHIATRIC  
ASSOCIATION  
PUBLISHING

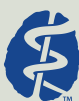

[www.appi.org](http://www.appi.org) • 1-800-368-5777 • [appi@psych.org](mailto:appi@psych.org)

AH1627A

# American Neuropsychiatric Association

The American Neuropsychiatric Association (ANPA), established in 1988, is an organization of professionals in neuropsychiatry, behavioral neurology, neuropsychology and the clinical neurosciences. Our mission is to improve the lives of people with disorders at the interface of psychiatry and neurology.

One strength of our organization is our diverse membership, which is comprised of professionals in all areas of neuroscience who share clinical and/or academic interests in neuropsychiatry. The interdisciplinary makeup of the membership encourages collaboration among educators, clinicians, researchers, students and trainees during research presentations, symposia, workshops, and continuing education courses. *The Journal of Neuropsychiatry and Clinical Neurosciences (JNCN)* is the official publication of the organization, and a subscription is a benefit of membership.

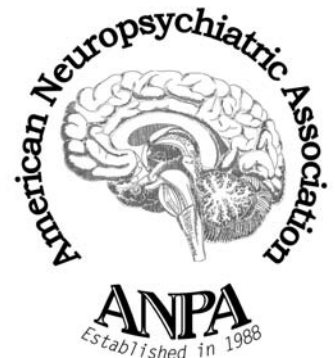

ANPA holds an annual scientific meeting that provides the opportunity for attendees to earn continuing education and maintenance of certification credits. Members are encouraged to submit their work for presentation at our annual meetings. Travel awards are available for promising trainee clinicians and investigators. Annual meeting abstracts and proceedings are published in *JNCN*.

## Benefits of Membership ←

- Subscription to *The Journal of Neuropsychiatry and Clinical Neurosciences (JNCN)*
- Discounts on subscriptions to PsychiatryOnline.com including DSM Premium and DSM Premium Plus
- Opportunities for presenting at the annual meeting with accepted abstracts published in the *JNCN*
- Significantly reduced registration fees at the annual meeting
- Newsletters, news updates, information on job and training opportunities, research and meeting information on the ANPA web site: [www.anpaonline.org](http://www.anpaonline.org)
- Discounted membership and meeting registration fees for trainees and students
- Collaboration in clinical, educational and research activities with opportunities to interact with leaders in the field
- Complimentary video recordings of the annual meetings
- Access to educational slide sets assembled by the Education Committee
- Membership in Special Interest Groups (SIGs) designed to draw together ANPA members with similar clinical, research, and academic interests for the purposes of peer discussion, education, and potential collaboration

## Contact Information ←

## → Join ANPA Now!

Website: [www.anpaonline.org](http://www.anpaonline.org) • Email: [anpaoffice@gmail.com](mailto:anpaoffice@gmail.com)

## Don't miss ANPA's 28<sup>th</sup> Annual Meeting

A stylized, high-contrast black and white illustration of the Atlanta skyline, featuring various skyscrapers and buildings. Overlaid on the skyline is the word "Atlanta" in a large, elegant, white cursive script. To the right of "Atlanta", the dates "March 8-11, 2017" are written in a bold, white, sans-serif font. Below the dates, "Georgia, USA" is written in a smaller, white, sans-serif font. In the bottom right corner, there is a small inset photograph of a modern hotel building, identified by the text "The Westin Buckhead Atlanta" above it.

Atlanta

March 8-11, 2017

Georgia, USA

The Westin Buckhead Atlanta

Join online at: [www.anpaonline.org](http://www.anpaonline.org)

# Meeting Announcement Call for Abstracts

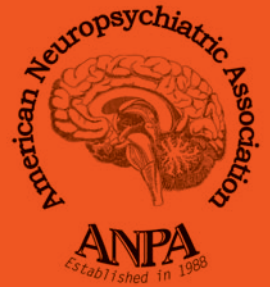

28<sup>th</sup> Annual Meeting  
American Neuropsychiatric Association  
March 8-11, 2017

# Atlanta

Georgia, USA

**You are invited** to submit abstracts reporting new research or challenging clinical cases for poster or platform presentation.

**DEADLINE EXTENDED! Submit Abstracts by NOVEMBER 2, 2016**

Abstracts presented at the meeting will be published online in *The Journal of Neuropsychiatry and Clinical Neurosciences*. Prior to submitting abstracts, please refer to our website for information about ANPA's award programs, platform sessions, and poster session.

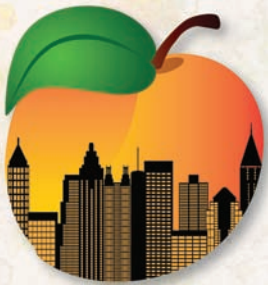

For more information contact the American Neuropsychiatric Association office at [anpaoffice@gmail.com](mailto:anpaoffice@gmail.com)

The Annual Meeting is not only a chance to network with hundreds of like-minded professionals, but also an opportunity to lend your voice, share your ideas, and raise new questions about brain-behavior relationships. Join us for three days of inspiration and fascination. The agenda is set to include these exciting sessions:

- Neuromodulation: What a Neuropsychiatrist Needs to Know
- Chronic Traumatic Encephalopathy
- Neuropsychiatry: Back to the Future
- Building Better Brains: The Ethics of Cognitive and Affective Enhancement
- Neuropsychiatric Presentations of Specific Lesions
- Brain-Immune Interactions in Neuropsychiatric Disorders
- Diagnostic Errors in Neuropsychiatry
- Neuroimaging in Mild TBI
- The Neurobiology of Political Ideology

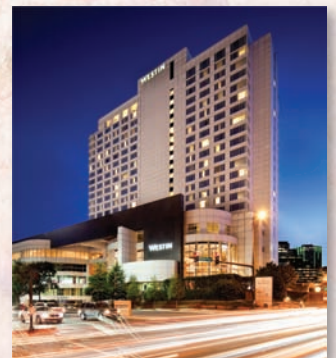

The Westin Buckhead Atlanta

Complete submission instructions available online at [www.anpaonline.org/call-for-abstracts](http://www.anpaonline.org/call-for-abstracts)  
Online Meeting Registration Opens December 2016: [www.anpaonline.org](http://www.anpaonline.org)
