# ASSESS FUNCTIONAL IMPAIRMENT ACROSS 6 IMPORTANT LIFE AREAS.

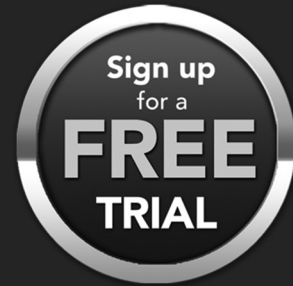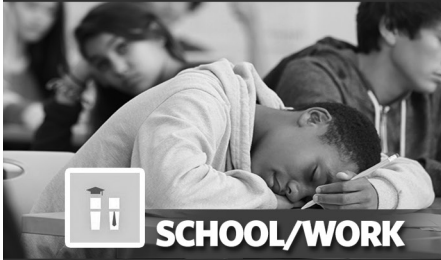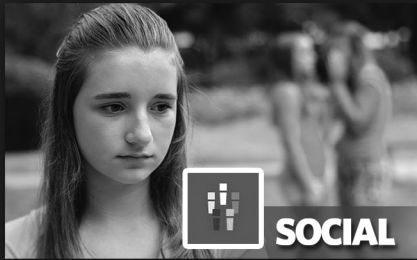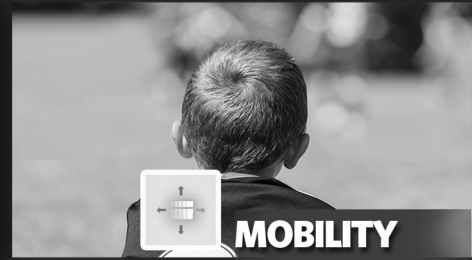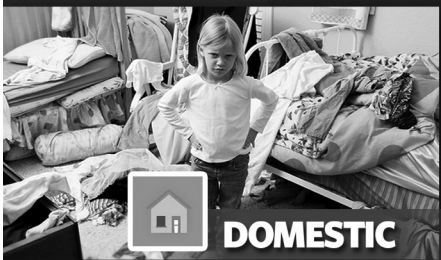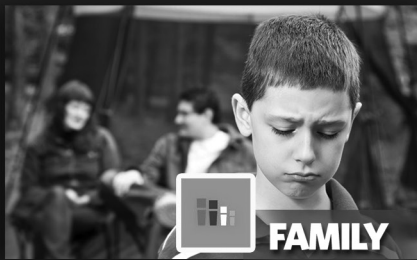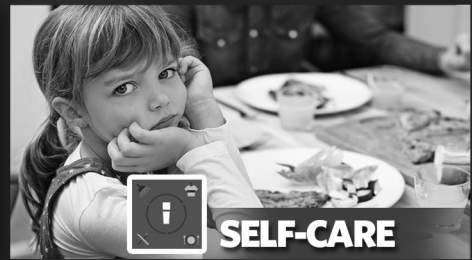

**RSI**™ **RATING SCALE OF IMPAIRMENT**™

Now Available!

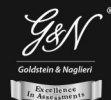

- **Determine if DSM-5/ICD-10 impairment criteria for a diagnosis are met** by identifying specific areas where functioning is impacted
- **Develop targeted treatment plans and monitor progress** by focusing on areas with the greatest impairment
- **Determine if service eligibility requirements are met** with IDEA compatibility
- **Assess impairment more clearly** by separating functional limitations from symptoms

Learn more at [MHS.com/RSI](http://MHS.com/RSI)

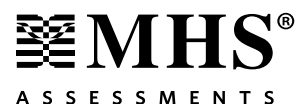

# The Journal of Neuropsychiatry and Clinical Neurosciences

Official Journal of the American Neuropsychiatric Association

## Editorial Board

The *Journal of Neuropsychiatry and Clinical Neurosciences* (ISSN 0895-0172), is published quarterly by the American Psychiatric Association (APA), 1000 Wilson Blvd., Suite 1825, Arlington, VA 22209. Copyright © 2016 American Psychiatric Association. The *Journal of Neuropsychiatry and Clinical Neurosciences*, is protected by copyright and may not be reproduced in any manner without written permission. The *Journal of Neuropsychiatry and Clinical Neurosciences* is abstracted/indexed in *Chemical Abstracts*, *Current Contents/Clinical Medicine*®, *EMBASE/Excerpta Medica*, *Index Medicus/MEDLINE/MEDLARS*, *PsycINFO*, *Psychological Abstracts*, *Research Alert*®, and *Sci Search*®. It is available through University Microfilms, Inc., 300 North Zeeb Road, Ann Arbor, MI 48106, in microform, electronic, or paper format.

Manuscript submissions should no longer be sent by mail. Please visit <http://mc.manuscriptcentral.com> to upload a paper online.

U.S. individual subscriptions are \$260 per year for 4 issues (\$208 for APA members); international subscriptions are \$392 per year (\$234 for online only). APA International Members receive a 20% discount off the online only rate for an individual online subscription. Institutional subscriptions are tier priced. For institutional site license information and pricing, please email us at [appi@psych.org](mailto:appi@psych.org), call (800) 368-5777 or visit [www.appi.org/ForLibrarians/](http://www.appi.org/ForLibrarians/). The *Journal of Neuropsychiatry and Clinical Neurosciences*, 1000 Wilson Blvd., Suite 1825, Arlington, VA 22209.

Advertising inquiries may be directed to Tim Wolfinger at PMI, 30 East 33rd St., New York, NY 10016; (212) 904-0379; [twolfinger@pminy.com](mailto:twolfinger@pminy.com).

APA is not responsible for statements made in this publication by contributors or advertisers. Unless stated, material in the *Journal of Neuropsychiatry and Clinical Neurosciences* does not reflect the endorsement, official attitude, or position of APA or the American Neuropsychiatric Association.

Periodicals postage paid at Arlington, VA, and additional mailing offices. POSTMASTER: Send address changes to the *Journal of Neuropsychiatry and Clinical Neurosciences*, 1000 Wilson Blvd., Suite 1825, Arlington, VA 22209.

### Editor

David B. Arciniegas, M.D.

### Editor Emeritus

Stuart C. Yudofsky, M.D.

### Deputy Editor

C. Alan Anderson, M.D.

### Assistant to the Editors

T. Angelita Garcia, M.B.A.

### Consulting Editors

C. Edward Coffey, M.D.  
Thomas W. McAllister, M.D.  
Henry Nasrallah, M.D.  
Fred Ovsiew, M.D.  
Jonathan M. Silver, M.D.

### Associate Editors

Sheldon Benjamin, M.D.  
Kevin J. Black, M.D.  
Nashaat N. Boutros, M.D.  
John J. Campbell, M.D.  
Miles Cunningham, M.D.  
Michael Ebert, M.D.  
Richard B. Ferrell, M.D.  
Laura A. Flashman, Ph.D.  
Yonas E. Geda, M.D.  
Daniel I. Kaufer, M.D.  
W. Curt LaFrance, M.D.  
Edward C. Lauterbach, M.D.  
Mario Mendez, M.D., Ph.D.  
Charles Nemeroff, M.D., Ph.D.  
Trevor R. P. Price, M.D.  
Robert G. Robinson, M.D.  
David A. Silbersweig, M.D.  
Robert Stern, Ph.D.  
Kaloyan S. Tanev, M.D.  
Paula T. Trzepacz, M.D.  
Hal S. Wortzel, M.D.

### Neuropsychiatry Classics Editor

Thomas C. Neylan, M.D.

### Book Review Editor

Michael Schrift, D.O., M.A.

### Windows to the Brain Editors

Robin A. Hurley, M.D.  
L. Anne Hayman, M.D.  
Katherine H. Taber, Ph.D.

### American Psychiatric Association Publishing

Rebecca D. Rinehart  
*Publisher*

Michael Roy  
*Editorial Director, Journals*

Angela Moore  
*Editorial Manager*

Susan Westrate  
*Production Manager, Journals*

Heidi Koch  
*Editorial Support Services Manager*

Patrick Hansard  
*Director of Marketing and Sales*

AMERICAN  
PSYCHIATRIC  
ASSOCIATION  
PUBLISHING

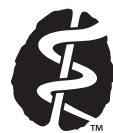

Please visit the Journal's website at [neuro.psychiatryonline.org](http://neuro.psychiatryonline.org)
